# Supplementary material for: Early Glaucoma Detection by Using Style Transfer to Predict Retinal Nerve Fiber Layer Thickness Distribution on the Fundus Photograph
Source: PubMed Central journal article supplement — Ophthalmol Sci. 2022 Jun 11;2(3):100180. doi: 10.1016/j.xops.2022.100180 (PMC9559108; doi:10.1016/j.xops.2022.100180), 2022-06-11
Supplement: mmc1.pdf [file mmc1.pdf]

**Supplementary Table 1.** Training pseudocode for the conversion of color fundus images to OCT thickness maps.

---



---

| Algorithm Fundus Image Translate to OCT Thickness Map training |                                                                                                                                                                                                         |
|----------------------------------------------------------------|---------------------------------------------------------------------------------------------------------------------------------------------------------------------------------------------------------|
| Require                                                        | Functions: <i>DIP</i> ( <i>Digital Image Processing</i> ), <i>CLFun.</i> ( <i>Compound Loss Function</i> ),<br>$\arg \min_{\theta} CLFun. (\theta), \eta/\sqrt{t + 1}, \partial L(\theta^t)/\partial w$ |
| Data                                                           | x (batch of training fundus images)<br>y (batch of raw OCT thickness map)                                                                                                                               |
| Parameter                                                      | $\eta$ (learning rate)<br>w(model weight)<br>$\sigma^t$ (root mean square of the previous derivatives of parameter w)                                                                                   |
| 0 :                                                            | for loop concept :                                                                                                                                                                                      |
| 1 :                                                            | for x $\in$ <i>training set</i> :                                                                                                                                                                       |
| 2 :                                                            | $x' \leftarrow DIP(x)$                                                                                                                                                                                  |
| 3 :                                                            | output $\leftarrow$ U-Net model ( $x'$ )                                                                                                                                                                |
| 4 :                                                            | $L \leftarrow CLFun. (\text{output}, y)$                                                                                                                                                                |
| 5 :                                                            | $L^* \leftarrow \arg \min_{Loss} CLFun. (L)$                                                                                                                                                            |
| 6 :                                                            | $w^{t+1} \leftarrow w^t - \frac{\eta^t}{\sigma^t}$                                                                                                                                                      |
| 7 :                                                            | Evaluate model performance with validation dataset                                                                                                                                                      |

---



---
