# Supplementary material for: Early Glaucoma Detection by Using Style Transfer to Predict Retinal Nerve Fiber Layer Thickness Distribution on the Fundus Photograph
Source: PubMed Central journal article supplement — Ophthalmol Sci. 2022 Jun 11;2(3):100180. doi: 10.1016/j.xops.2022.100180 (PMC9559108; doi:10.1016/j.xops.2022.100180), 2022-06-11
Supplement: mmc2.pdf [file mmc2.pdf]

**Supplementary Table 2.** Differences in the parameters and operating time of U-Net with various depths.

| Architecture | Parameters | Infer Time(ms) |              |
|--------------|------------|----------------|--------------|
|              |            | GPU            | CPU          |
| 4 x 4 U-Net  | 13.40M     | 4.70±0.96      | 353.30±16.83 |
| 5 x 5 U-Net  | 53.52M     | 5.38±1.05      | 436.38±11.44 |
| 6 x 6 U-Net  | 213.97M    | 6.60±1.28      | 622.08±29.77 |

Note: The pytorch framework was used for training the DL networks. The parameters were provided by the built-in statistic model of pytorch.
